# Supplementary material
Source: publisher site journal article supplement (https://www.degruyterbrill.com/publication/journal_key/AUA/downloadAsset/AUA_Leseprobe.pdf)
Supplement: Supplementary file 1 [file AUA_Leseprobe.pdf]

# Außeruniversitäre Aktion.

Wissenschaft und Gesellschaft im Gespräch

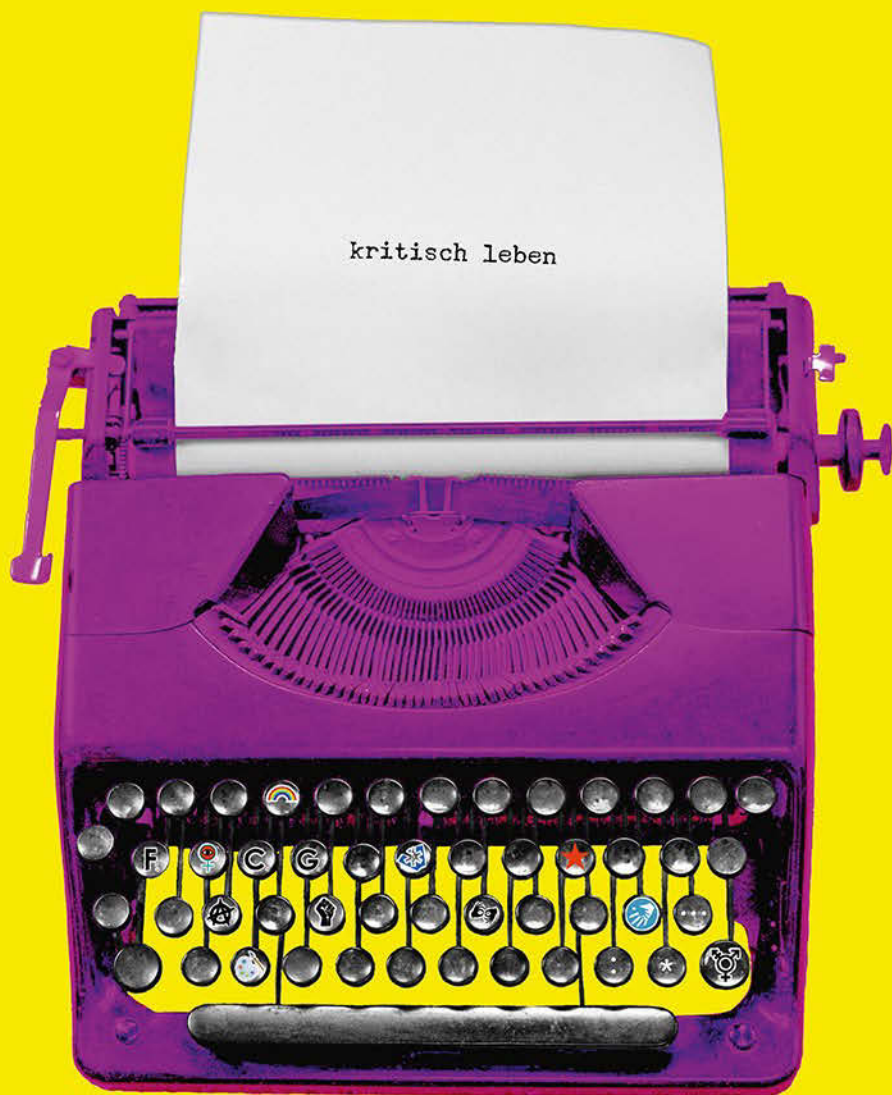

[transcript]

**Aus:**

*Helen Akin, Cindy Salzwedel, Paul Helfritzsich (Hg.)*

## **Außeruniversitäre Aktion**

Wissenschaft und Gesellschaft im Gespräch

Jg. 1, Heft 1/2022: kritisch leben

April 2022, 194 S., kart., 6 SW-Abb., 10 Farbabb.

22,00 € (DE), 978-3-8376-6042-5

E-Book: kostenlos erhältlich als Open-Access-Publikation

PDF: ISBN 978-3-8394-6042-9

Gesellschaftskritik findet in der Wissenschaft meist nicht ihres Eigenwertes wegen Beachtung, sondern wird als Beispiel für die eigene Theoriebildung verwendet und in die bestehende universitäre Artikulationsform eingepasst. Die Zeitschrift »Außeruniversitäre Aktion« hat den Anspruch, den sozial- und geisteswissenschaftlichen Diskurs für die außeruniversitäre Literatur, das außeruniversitär bestehende Denken und vor allem für kritische Praxisformen zu öffnen.

Die erste Ausgabe nimmt Formen der Kritik und Theoriebildung jenseits der Universität in den Blick, für die der »Elfenbeinturm« meist blind ist.

**Helen Akin** promoviert in der Philosophie an der FSU Jena zur »Dialektik der Entfremdung«. Sie hat Literaturwissenschaft, Kunstgeschichte, Soziologie und Religionsphilosophie in Frankfurt am Main studiert.

**Cindy Salzwedel** promoviert an der FSU Jena zu »Kapitalismuskritik in sozialen Bewegungen« in der Soziologie. Sie hat dort Politikwissenschaft, Philosophie und Religionswissenschaft studiert.

**Paul Helfritzsich** (Dr. phil.) lehrt Philosophie mit methodischem Schwerpunkt in Phänomenologie, Existenzialismus und Poststrukturalistischer Theorie als Postdoc an der Universität Wien. Sie\*r forscht im Bereich der Emotionstheorie, zu Fragen der Sozialphilosophie, der Geschlechtergerechtigkeit sowie zu Aspekten widerständiger Bildung.

Weitere Informationen und Bestellung unter:  
[www.transcript-verlag.de/978-3-8376-6042-5](http://www.transcript-verlag.de/978-3-8376-6042-5)

# Inhalt

---

|                      |   |
|----------------------|---|
| kritisch leben?..... | 9 |
|----------------------|---|

|                         |    |
|-------------------------|----|
| living critically?..... | 15 |
|-------------------------|----|

## BERICHT ÜBER DIE GEFÄHRDUNG VON FRAUEN UND FEMIZIDE IN DEUTSCHLAND

### Germany

Deadly Consequences Based on Ignorance of Rule of Law

|                                |    |
|--------------------------------|----|
| Kristina Felicitas Wolff ..... | 23 |
|--------------------------------|----|

## DIE HEIMTÜCKEN DES ALLTAGSRASSISMUS

### Ich, Dilek Divan

Ein Erfahrungsbericht über Alltagsrassismus

|                   |    |
|-------------------|----|
| Dilek Divan ..... | 47 |
|-------------------|----|

## PERSPEKTIVEN AUF DIE INKLUSION VON UND DIE ARBEIT MIT MENSCHEN MIT BEHINDERUNG

### Behinderungen – das sind Facetten und Möglichkeiten des Menschseins

|                                    |    |
|------------------------------------|----|
| Helen Akin im Gespräch mit B. .... | 53 |
|------------------------------------|----|

### Inklusionsanspruch und Schulwirklichkeit

Versuch einer kritischen Deutung meiner Arbeitserfahrungen als Schulassistent

|                          |    |
|--------------------------|----|
| Huschke Kleinteich ..... | 63 |
|--------------------------|----|

### Die Schulbegleitung muss kein bürokratisches Monster bleiben

Alternative Möglichkeiten aus der Perspektive einer Schulbegleiterin

|               |    |
|---------------|----|
| Johanna ..... | 75 |
|---------------|----|

## **PERSPEKTIVE EINER TRANSIDENTEN PERSON: GESAMTGESELLSCHAFTLICHE ENTWICKLUNG UND PERSÖNLICHE WEGE DER SELBSTVERWIRKLICHUNG**

**Kritik heißt nicht nörgeln, sondern machen!**

Dana Diezemann im Gespräch mit Helen Akin ..... 83

## **FEMINISTISCHE ORGANISATION IM KAMPF GEGEN STAAT, PATRIARCHAT UND KAPITALISMUS**

**Frauen\*Streikbündnis Jena – Auf zum feministischen Streik**

Drei Aktivist\*innen des Frauen\*Streikbündnisses ..... 95

## **PFLEGENOTSTAND UND DIE PROBLEME MEDIZINISCHER VERSORGUNG AM MASSSTAB DER MENSCHENRECHTE**

**Ist Gesundheitsversorgung in Deutschland kein Menschenrecht?**

Interview mit Helma und Jacob vom MediNetz Jena

Helma & Jakob im Gespräch mit der AuA-Redaktion ..... 123

**Lasst uns die Gesundheit über die Profite stellen!**

Interviewkurzfassung von Cindy Salzwedel ..... 131

## **ÜBER ARBEITSRECHTE, STAATLICHE AKTIVIERUNGSMASSNAHMEN UND KLASSENKAMPF**

**Ungenügend, schikanös und kontraproduktiv – die Hartz-IV-Gesetzgebung aus  
der Perspektive einer Sozialarbeiterin**

Verena Cömert ..... 135

**Klassenkampf erlernen – gewerkschaftliche Basisarbeit an der Universität**

Von Frankfurt nach Bornheim und zurück

Anna Wunderlich (unter\_bau) im Gespräch mit Christoph Sommer (diskus-Redaktion) ..... 141

## **AKADEMISCHE KRITIKVERSTÄNDNISSE – POTENTIALE FÜR EINE EMANZIPATORISCHE PRAXIS**

**Kritik (in) der Kritischen Theorie**

Peggy H. Breitenstein ..... 153

**Über kritische Performativität und performative Kritik**

Alice Lagaay im Gespräch mit Anna Suchard (vm. Seitz) ..... 161

## **ÜBER UNS, DIE IDEE DIESER ZEITSCHRIFT UND IHRE KÜNSTLERISCHE UMSETZUNG**

### **Von Reims bis Jena**

Helen Akin ..... 175

### **Kritik als Pendelbewegung**

Cindy Salzwedel ..... 181

### **Kritik als Stolpern und Erschrecken – Kritik aus Trotz**

Paul\*A Helfritsch ..... 185

### **Kritische Töne anschlagen**

Joule Weisz ..... 189

## kritisch leben?

---

### Abstract

*This text contains the introduction and the summary of the contributions of this first issue. As editors, we have focused on the commonalities of experiences between people forced into a critical engagement by authoritarian, discriminatory and capitalist structures in order to highlight their different practices of criticizing, resisting and subverting. We attempt to make these forms of critique from outside the university more audible. By trying to do so, we have had to question our approach repeatedly, as it has (been and continues to be shown) become apparent that the process of listening is challenging and requires an openness that can by no means be taken for granted.*

### Title

*living critically?*

### Keywords

*social critique, self-critique, knowledge transfer, discriminatory experience*

..., das tut weh! Wer kritisch lebt, wer Kritik nicht als Selbstzweck übt, die\*r stellt sich den momentanen Gegebenheiten entgegen und damit auch der Art und Weise, wie es für eine\*n selbst innerhalb der Gesellschaft vorgegeben ist, zu leben. Mehr noch tun die Umstände weh, die zu Kritik veranlassen. Weit davon entfernt, dass kritisch zu leben immer Akt einer freien Entscheidung wäre, werden von Diskriminierung betroffene Personen zur Auseinandersetzung mit dem Gegebenen gezwungen. Wer kritisch lebt, stellt das Bestehende in Frage und erzeugt so eine Irritation, eine Ablehnung, mitunter eine Verletzung dieses Gegebenen und der es aufrechterhaltenden Akteur\*innen.<sup>1</sup>

---

1 Das Sternchen innerhalb oder an Personen- oder Gruppenbezeichnungen markiert in dieser Zeitschrift, dass es sich bei den so gekennzeichneten Begriffen um geschlechtsneutrale Formen der Bezugnahme handelt.

Auf die Gemeinsamkeit der Akteur\*innen, durch autoritäre, diskriminierende und kapitalistische Strukturen in kritische Auseinandersetzung gezwungen zu werden, haben wir als Redakteur\*innen den Blick gelenkt, um ihre unterschiedlichen Praxen herauszustellen. Unser Versuch besteht darin, diese Formen der Kritik außerhalb der Universität ein Stück weit hörbarer zu machen. Bei diesem Versuch mussten wir uns selbst immer wieder hinterfragen, da sich zeigte und immer wieder zeigt, dass der Prozess des Zuhörens eine Herausforderung darstellt, eine Offenheit erfordert, die keineswegs als selbstverständlich angesehen werden kann.

Wir als Redaktionskollektiv haben an unsere Arbeit einen emanzipatorisch intersektionalen Anspruch. Deshalb wollen wir besonders darauf hinweisen, dass eine der größten Lücken dieser ersten Ausgabe und auch unserer bisherigen Arbeit das Thema des Antirassismus betrifft: Für keinen anderen Bereich haben wir so viele Anfragen versendet wie für diesen, insgesamt an fünf Initiativen aus Wien, Frankfurt a. M. und Hanau sowie an drei Privatpersonen. Gleichzeitig erreichten uns aus keinem anderen Bereich so viele Absagen. Die Gründe lagen dabei oftmals nicht im mangelnden Interesse der Angefragten, sondern in einem Kapazitätsproblem. Für die nächsten Ausgaben wollen wir Wege finden, Akteur\*innen in solchen Situationen mit unseren Kapazitäten zu unterstützen. Ebenso sollen ökologische Fragen und Problemstellungen in den kommenden Ausgaben mehr Raum erhalten.

Einige weitere Fragen, die wir aus dem Entstehungsprozess der Zeitschrift mitnehmen, möchten wir kurz anführen: Wie werden wir dem in unserem Titel formulierten Anspruch gerecht, vor allem außeruniversitären Akteur\*innen Raum zu geben? Wie erreichen wir entsprechende Personengruppen und erläutern unser Interesse an ihren Beiträgen? Wie gelingt es uns, die Einzigartigkeit von Erfahrungen wertzuschätzen, ohne sie vorschnell in Rubriken einzuordnen? Und auch: Wie können wir bislang ungehörten Stimmen zu einer Hörbarkeit verhelfen, ohne die gängige Polarisierung zwischen Normalität und Andersheit zu reproduzieren?

Wir, das sind drei an der Universität und deren Strukturen partizipierende Personen unterschiedlicher Herkunft und Sozialisation, die mit dem vorliegenden Heft erst begonnen haben, die oben genannten und selbst gestellten Aufgaben zu bearbeiten. Mehr zur Beschreibung unseres jeweiligen persönlichen Anliegens, an dieser Zeitschrift mitzuarbeiten, findet sich in der Form kurzer Selbstverständnisse am Ende dieser Ausgabe. Was uns alle verbindet, ist die Erfahrung, dass in verschiedensten Teilen der Universität, aber auch der Gesellschaft ein unnötig akademisierter Diskurs über die Köpfe von Betroffenen und Aktivist\*innen hinweg geführt wird: Wo außeruniversitäre Kritikformen überhaupt in den Wissenschaften aufgegriffen werden, finden sie zumeist nicht ihres Eigenwertes wegen Beachtung, sondern werden als Beispiele für die eigene Theoriebildung verwendet und in die bestehenden Artikulationsformen eingepasst; um ihrer selbst willen werden sie nur in den seltensten Fällen gehört und ebenso selten zum Impuls genommen, die eigene Praxis umzugestalten.

Aufgrund unseres Anliegens und der in den abgedruckten Beiträgen formulierten Kritiken war die Gestaltung des Inhaltsverzeichnisses alles andere als offensichtlich. Uns ging es dabei sowohl darum, eine Hierarchisierung der Beiträge nach eventueller Dringlichkeit zu vermeiden, als auch darum, sie nicht ohne Einordnung lose oder beliebig zu verbinden.

Zu Beginn steht ein Text von Kristina Wolff, der, gewissermaßen, eine Sonderstellung beansprucht. Wir haben sie um einen Beitrag gebeten, weil sie das Gespräch zwi-

schen Universität und Gesellschaft in ihrer Person vereint. Sie hat die wissenschaftlich umfangreichste Datensammlung zum Thema Gewalt gegen Frauen und Femizide für Deutschland angelegt, und auch als Aktivistin immer wieder Protestaktionen, bspw. mit *Femen Deutschland*, initiiert. Ihr Text ist nun keine Reflexion über ihr kritisches Engagement, sondern, und darüber freuen wir uns sehr, ein Bericht über die aktuelle Lage der Gewalttaten gegen Frauen und den Stand der Umsetzung der *Istanbul Konvention* in Deutschland. Der Titel dieses Berichtes lautet: *Germany. Deadly Consequences Based on Ignorance of Rule of Law*.

Daran anschließend findet sich eine Rubrik mit dem Titel *Die Heimtücken des Alltagsrassismus*. In ihrem Beitrag *Ich, Dilek Divan* macht die gleichnamige Autorin eindrucksvoll deutlich, dass rassistische und antifeministische Verhaltensweisen in unserer Gesellschaft so sehr verinnerlicht sind, dass sie sogar in solchen linken Kreisen auftauchen können, in denen explizit anti-rassistische und feministische Positionen vertreten werden. Rassismus kann subtilere Formen annehmen als die offene Beleidigung – er kann sich, so schildert Dilek Divan, *zwischen den Zeilen* von Sprache und Handlung hinterhältig einnisten. In ihrem Beitrag verzahnt sie die eigenen Erfahrungen der Missachtung und Herabwürdigung aufgrund ihres Namens und seiner Herkunft mit einer systemischen Perspektive auf rassistische Strukturen.

In den nächsten Beiträgen widmet sich die Zeitschrift verschiedenen *Perspektiven auf die Inklusion von und die Arbeit mit Menschen mit Behinderung*: B. ist 63 Jahre alt und seit 43 Jahren als Heilerziehungspfleger für Menschen mit Behinderungen tätig. Er gibt einen Einblick in seinen Berufsalltag, schildert sein Erleben der Entwicklungen in der Behindertenhilfe der letzten Jahrzehnte und evaluiert ihre Fort- und Rückschritte. Er appelliert an Auszubildende der Heilerziehungspflege, sich von den Erschwerissen des Pflegesystems nicht auffressen zu lassen und stattdessen an ihren Idealen und Vorstellungen von Menschlichkeit festzuhalten.

Huschke Kleinteich berichtet von seiner mehrjährigen Arbeit als Schulbegleiter zweier Schüler\*innen mit geistigen Entwicklungsverzögerungen. In seinem Beitrag *Inklusionsanspruch und Schulwirklichkeit – Versuch einer kritischen Deutung meiner Arbeitserfahrungen als Schulassistent* stellt er zum einen heraus, dass die schulische Inklusion bei gleichzeitigem Fortbestand der etablierten Regelpädagogik zur Exklusion der Betroffenen an nur verändertem Ort führt; zum anderen skizziert er, welche Probleme die Doppelstruktur einer freien Trägerschaft in Hinsicht auf die Arbeitsbedingungen von Beschäftigten mit sich bringen kann. Kleinteichs Arbeitserfahrungen mündeten in die Gründung der *initiative kritische schulassistenten*.

Die Schulbegleiterin Johanna schildert in ihrem Erfahrungsbericht *Die Schulbegleitung muss kein bürokratisches Monster bleiben. Alternative Möglichkeiten aus der Perspektive einer Schulbegleiterin* einige Schwierigkeiten, mit denen sie sich alltäglich in ihrem Beruf konfrontiert sieht, sowie Hindernisse und Widersprüche, die sich im Zuge der Beantragung einer Schulbegleitung ergeben können. Außerdem kritisiert sie, dass in Ermangelung eines allgemein verbindlichen Konzepts der Schulbegleitung eigentlich jede\*r diese nach individuellen Vorstellungen ausgestalten müsse und daher häufig viel mehr Aufgaben für die Klassengemeinschaft übernommen würden als eigentlich vorgesehen. Schließlich eröffnet sie abschließend eine Perspektive, wie ihres Erachtens eine gelingende Schulbegleitung aussehen könnte.

Unter dem Obertitel *Perspektive einer transidenten Person: Gesamtgesellschaftliche Entwicklungen und persönliche Wege der Selbstverwirklichung* berichtet Dana Diezemann



– deutsche Hörfunkmoderatorin, Journalistin, Referentin für Transidentität und Expertin für Bildsensoren und Kameras – in ihrem Beitrag *Kritik heißt nicht Nörgeln, sondern Machen*, dass sie als Frau in einen männlichen Körper hineingeboren wurde und dies erst nach einem halben Leben erkannt und korrigiert hat. Sie schildert, wo und von wem ihr alltäglich Ablehnung entgegengebracht wird, und hebt hervor, dass zu Kritikfähigkeit Offenheit und Wandlungsbereitschaft sowie Selbstkritik gehören.

Bei dem folgenden Text in der Rubrik *Feministische Organisation im Kampf gegen Staat, Patriarchat und Kapitalismus* handelt es sich um einen Beitrag des *Frauen\*Streikbündnisses Jena* mit dem Titel *Frauen\*Streikbündnis Jena – Auf zum feministischen Streik*, für den die Autor\*innen ihre Bündnispartner\*innen *Decolonize Jena*, die *Bürgerinitiative für Soziales Wohnen* in Jena und die *FAU Jena* interviewen, um über Kritik und die Akademisierung der politischen Linken zu sprechen. Sie stellen damit außerdem performative Formen der Kritik an der Gesellschaft vor und werfen kritische Fragen über den Prozess des Schreibens für unsere Zeitschrift auf. Für alle ist die Wichtigkeit und Notwendigkeit des feministischen Streitens und Streikens verbindendes Element.

Diesem Beitrag fügte das *Frauen\*Streikbündnis* außerdem noch ein Ergänzungsschreiben hinzu, in dem es sich aufgrund aktueller Vorkommnisse innerhalb des Bündnisses mit der Thematik des Alltagsrassismus auseinandersetzt. Während der redaktionellen Bearbeitung des Beitrags, wurde dem *Frauen\*Streikbündnis* bekannt, dass eine der Herausgeber\*innen des *FLUT Magazins für gegenwärtige Erotik* – eine\*r ihrer Bündnispartner\*innen – mit einer Bewerberin, die *Woman of Colour* ist und ein Foto eingereicht hatte, rassistisch umgegangen war. Daraufhin kam es zu mehreren Treffen und einem wechselseitigem E-Mail-Austausch zwischen der Redaktion der *AuA*, Vertreter\*innen des *Frauen\*Streikbündnisses* und eben jener Herausgeberin. Das *Frauen\*Streikbündnis* berichtet von diesem Bearbeitungsprozess und den Folgen, die es aus ihm zieht.

Dem folgen zwei Beiträge zur Rolle von Care- bzw. Reproduktionsarbeit unter der Rubrik *Pflegenotstand und die Probleme medizinischer Versorgung am Maßstab der Menschenrechte* verknüpft haben: Im ersten der Beiträge haben uns Helma und Jacob vom *MediNetz Jena* auf Fragen geantwortet, die auf ihre persönlichen Erfahrungen bei der Unterstützung von Menschen ohne Krankenschein und ihr Verständnis von Kritik sowie darauf abzielten, was sie sich für die Zukunft dieser zivilgesellschaftlichen Hilfseinrichtung vorstellen.

Beim zweiten Beitrag handelt es sich um die Zusammenfassung eines Video-Interviews mit Steffi Fitzner von *Klinik statt Fabrik*, das wir im Juli 2021 in Jena mit ihr geführt haben. Sie spricht über die Kritikpunkte, die sie als Krankenschwester und Gewerkschafterin am Klinik-Betrieb hat, sowie über die Auswirkungen, die die Coronavirus-Pandemie auf ihren (Arbeits)Alltag hatte. Außerdem berichtet sie von Streiks, den Hürden eines Arbeitskampfes in einer Klinik und ihren Forderungen nach Entlastung.

In der Rubrik *Über Arbeitsrechte, staatliche Aktivierungsmaßnahmen und Klassenkampf* folgen der Erfahrungsbericht *Ungenügend, schikanös und kontraproduktiv – die Hartz-IV-Gesetzgebung aus der Perspektive einer Sozialarbeiterin* und ein Gespräch zwischen der Hochschulgewerkschaft *unter\_bau* und streikenden rumänischen Arbeiter\*innen. Zuerst führt uns Verena Cömert vor Augen, was die Lebenswirklichkeit *Hartz IV* konkret bedeutet, welche Rechte und Pflichten damit verbunden sind und weshalb dieses (vermeintliche) Unterstützungssystem aus Sicht der Sozialen Arbeit

kritisiert werden muss. Hierfür nimmt sie das Thema aus persönlicher und professioneller Perspektive in den Blick und betrachtet sowohl die Gesetzgebung als auch die Seite der Leistungsempfänger\*innen. Dieser Erfahrungsbericht scheint uns, weil er u.a. eine Innenansicht aus dem Amt darstellt, eine wichtige Stütze für die Kritik von *Hartz-IV*-Selbstorganisationsgruppen zu sein.

*Klassenkampf erlernen – gewerkschaftliche Basisarbeit an der Universität. Von Frankfurt nach Bornheim und zurück* ist der Titel eines erstmals im *diskus* veröffentlichten Beitrags. Er entstand im Anschluss an den Streik rumänischer Arbeiter\*innen bei der Firma *Spargel Ritter* im Mai 2020. Die basisdemokratische Gewerkschaft der Universität Frankfurt – der *unter\_bau* – berichtet von ihren Erkenntnissen, die aus den Gesprächen mit den Streikenden über gewerkschaftliche Organisation, deren Schwierigkeiten sowie mögliche Hindernisse und Widersprüche in der Bildung von Klassenbewusstsein erwachsen sind.

Bis zu diesem Punkt geht es unserer Zeitschrift um die Darstellung und das Zu-Wort-kommen-Lassen außeruniversitärer Beiträge. Daran schließen nun, dem Untertitel der Zeitschrift – *Wissenschaft und Gesellschaft im Gespräch* – entsprechend, akademische Kritikverständnisse an. Den Anfang macht Peggy H. Breitenstein mit einer Beschreibung des Kritikverständnisses, das vom alltäglichen Begriff über seine griechischen Ursprünge bis zu Kant, Marx, Horkheimer und Adorno führt, um am Ende in einer Beschreibung der Ideologiekritik als emanzipatorischer Sozial- und Selbstkritik zu münden. Es folgt ein Beitrag von Alice Lagaay und Anna Suchard: Sie treten in ein Gespräch über die Suche nach neuen Formaten für die Vermittlung von philosophischen Inhalten durch verschiedene Mittel der Performance, um dadurch einen kritischen Blick auf habitualisierte Wissenschaftsformen und -hierarchien zu entwickeln. Wissen – so machen die Autor\*innen deutlich – braucht keinen einsamen Schreibisch fernab der Welt, sondern Dialoge, Ereignisse, Prozesse, in denen es gemeinsam als Praxis generiert werden kann.

Wie schon zu Beginn angemerkt, versuchen wir als Redaktion am Ende der Zeitschrift selbst eine Beschreibung dessen zu geben, was uns persönlich zur Arbeit an ihr bewogen hat. Dort findet sich zudem ein Beitrag von Joule Weisz über die Gestaltung des Titelbildes dieser ersten Ausgabe der *Außeruniversitären Aktion*.

Zum Abschluss bleibt uns noch, allen Leser\*innen zu wünschen, dass sie in dieser ersten Ausgabe eine anregende Lektüre und Impulse für das kritische Leben finden. Wir hoffen mit diesem Heft einen Beitrag zur Bekanntmachung bislang wenig beachteter Bewegungen und Perspektiven zu leisten, sodass diesen künftig mehr Wertschätzung zuteilwird und ihre Kritiken ernst genommen werden.

Neben allen beitragenden Autor\*innen, Initiativen und Bündnissen sowie Künstler\*innen möchten wir an dieser Stelle einen besonderen Dank an Sonja Deppe richten, deren Hilfe vor allem während der Anfangsphase dieses Projektes viel Gutes zum Gelingen beigetragen hat.

Jena/Wien, den 31.10.2021

Helen Akin, Cindy Salzwedel & Paul\*A Helfritsch

## living critically?

---

### Abstract

*This text contains the introduction and the summary of the contributions of this first issue. As editors, we have focused on the commonality of people forced into critical engagement by authoritarian, discriminatory and capitalist structures in order to highlight their different practices. We attempt to make these forms of critique from outside the university more audible. By trying to do so, we have had to question our approach repeatedly, as it has (been and continues to be shown) became apparent that the process of listening is challenging and requires an openness that can by no means be taken for granted.*

### Title

*living critically?*

### Keywords

*social critique, self-critique, knowledge transfer, discriminatory experience*

... that hurts! Living critically and not criticizing as a purpose in itself means to face up to concrete circumstances and, with this, also to face the way these circumstances are given for oneself within the society. Further, the circumstances themselves can cause trouble and pain, which set off critical thinking. Without it always being an act of free choice, people affected by discrimination, for instance, are forced to live critically and confront the present situation. Those who live critically question the given and thus generate an irritation, a rejection, sometimes a disruption of the prevailing circumstances and of the actors who maintain it.

As editors, we have focused on the commonalities between people forced into critical engagement by authoritarian, discriminatory and capitalist structures in order to highlight their different practices. We attempt to make these forms of critique from outside the university more audible. By trying to do so, we have had to question our approach repeatedly, as it has (been and continues to be shown) became apparent that

Corresponding author: Helen Akin, Cindy Salzwedel & Paul\*A Helfritzscht;

[aua-redaktion@riseup.net](mailto:aua-redaktion@riseup.net)

<http://orcid.org/0000-0001-7976-8212> (Helen Akin);

<http://orcid.org/0000-0002-3464-4731> (Cindy Salzwedel);

<http://orcid.org/0000-0002-9229-5007> (Paul\*A Helfritzscht)

 Open Access. © Helen Akin, Cindy Salzwedel & Paul\*A Helfritzscht 2022,

published by transcript Verlag

This work is licensed under the Creative Commons Attribution 4.0 (BY) license 2022

the process of listening is challenging and requires an openness that can by no means be taken for granted.

We as an editorial collective have an emancipatory intersectional attunement to our work. Therefore we would like to point out that one of the biggest gaps in this first issue and also in our work so far concerns the topic of anti-racism: there was no other area for which we sent out as many requests as for this one, all together to five initiatives from Vienna, Frankfurt a.M., and Hanau as well as to three private individuals. However, at the same time, we received more refusals than in any other area. The reasons given were often not a lack of interest on the side of the inquirers, but a capacity problem. For the next issues, we aim to find ways to support actors with similar difficulties with our capacities. Likewise, ecological questions and problems will be given more space in the coming issues.

We would like to briefly mention a few other questions that we took away from the process of creating the journal: How do we live up to the claim formulated in our title: to give space, especially to non-university actors? How do we reach the relevant groups of people and communicate our interest in their contributions? How do we succeed in appreciating the uniqueness of experiences without hastily categorizing them? Lastly, how can we help previously unheard voices to be heard without reproducing the common polarization between normality and otherness?

We are three people from different backgrounds and socialization who (participate in the) experience of the university and its structures and who have just begun to work on the above-mentioned self-imposed tasks. More about our (respective) personal (concerns) incentives to participate in this journal can be found in the form of short self-locating texts at the end of this issue. What unites us all is the distinct experience that in various parts of (the) university, as well as of society, an unnecessarily academized discourse is conducted over the heads of those that are concerned and activists likewise: When non-university forms of critique unrelated to university are picked up at all in the sciences, they are usually not appreciated for their intrinsic value, but are used as examples for one's own theory and fitted into existing forms of articulation; for their own sake, they are (only) rarely heard and just as rarely taken as an impulse to reshape one's own practice.

Because of our concerns and the critiques formulated in the printed articles, the design of the table of contents was anything but obvious. We were aiming towards both avoiding hierarchizing the contributions according to posited urgency and avoiding connecting them loosely or arbitrarily without classification.

In the beginning of the issue, there is a text by Kristina Wolff, which, in a way, claims a special position. We asked her to contribute to the articles because she perfectly unites the conversation between university and society in her person. She has compiled the most comprehensive scientific collection of data on violence against women and femicide, and as an activist, she has also repeatedly initiated protest actions, for example with Femen Germany. Her text presented here is not a reflection on her academic critical engagement, but rather, and we are pleased about this, a report on the current situation of violence against women and the state of implementation of the *Istanbul Convention* in Germany. The title of this report is *Germany. Deadly Consequences Based on Ignorance of Rule of Law*.

This is followed by a section entitled *Die Heimtücken des Alltagsrassismus*. In her contribution, *Ich, Dilek Divan*, the author, Dilek Divan, makes a striking case that ra-

cist and anti-feminist behaviors are so internalized in our society that they can appear even in those leftist circles where explicitly anti-racist and feminist positions are held. Racism can take more subtle forms than an overt insult – it can, Divan describes, *sneak in between the lines of language and action*. In her contribution, she intertwines her own experiences of disrespect and degradation because of her name and its origin with a systemic perspective on racist structures.

In the next contributions, the journal devotes itself to different *Perspektiven auf die Inklusion von und die Arbeit mit Menschen mit Behinderung*: B. is 63 years old and has been working as a curative education nurse for people with disabilities for 43 years. He gives an insight into his everyday professional life, describes his experience of the developments in disability care over the last decades, and evaluates their progress and regress. He appeals to trainees in special education nursing not to be consumed by the aggravations of the care system and instead to hold on to their ideals and ideas of humanity.

Huschke Kleinteich reports on his work over several years as a school support teacher for two students with mental developmental delays. In his contribution *Inklusionsanspruch und Schulwirklichkeit – Versuch einer kritischen Deutung meiner Arbeitserfahrungen als Schulassistent*, he points out on the one hand that school inclusion with a simultaneous continuance of the established regular pedagogy almost leads to the aggravation of exclusion experiences for those concerned; on the other hand, he outlines problems the double structure of an independent sponsorship can bring with it concerning the working conditions of employees. Kleinteichs work experiences led to the founding of the *initiative kritische schulassistentenz*.

Johanna, a school support worker, describes in her experience report *Die Schulbegleitung muss kein bürokratisches Monster bleiben. Alternative Möglichkeiten aus der Perspektive einer Schulbegleiterin* some difficulties, with which she is confronted in her everyday work, as well as obstacles and contradictions, which can arise in the course of the application for school support. In addition, she criticizes that in the absence of a generally binding concept of school support, each person must actually design it according to individual ideas and therefore often takes on many more tasks for the class community than intended. Finally, she opens up a perspective on how, in her opinion, successful school support could look.

Under the heading, *Perspektive einer transidenten Person: Gesamtgesellschaftliche Entwicklungen und persönliche Wege der Selbstverwirklichung*, Dana Diezemann – German radio presenter, journalist, speaker on trans identity and expert on image sensors and cameras – reports in her contribution *Kritik heißt nicht Nörgeln, sondern Machen* that she was born as a woman into a male body and only recognized and corrected this after half a lifetime. She describes where and by whom she is met with rejection on a daily basis, and emphasizes that the ability to criticize includes openness and a willingness to change, as well as self-criticism.

The following text in the section *Feministische Organisation im Kampf gegen Staat, Patriarchat und Kapitalismus* is a contribution of the *Frauen\*Streikbündnis Jena* with the title *Frauen\*Streikbündnis Jena – Auf zum feministischen Streik*, for which the authors held interviews with their alliance partners *Decolonize Jena*, the *Bürgerinitiative für Soziales Wohnen* in Jena and the *FAU Jena* to talk about critique and the academization of the political left. In doing so, they also introduce performative forms of critique of society and raise critical questions about the process of writing for our journal.

For all of them, the importance and necessity of feminist argument and strike is a unifying element.

To this article, the *Frauen\*Streikbündnis* also added a supplementary letter addressing the issue of everyday racism due to recent incidents within the alliance. During the editing of the article, the *Frauen\*Streikbündnis* became aware that one of the editors of the *FLUT Magazins für gegenwärtige Erotik* – one of their alliance partners – had been racist with an applicant who is a woman of color and had submitted a photo. As a result, there were several meetings and mutual e-mail exchanges between the editors of AuA, representatives of the *Frauen\*Streikbündnis*, and that same editor. The *Frauen\*Streikbündnis* reports on this editing process and the consequences it has drawn from it.

This is followed by two contributions on the role of care and reproductive work, which we have linked under the heading *Pflegenotstand und die Probleme medizinischer Versorgung am Maßstab der Menschenrechte*. In the first of the contributions, Helma and Jacob from *MediNetz Jena* answered our questions that aimed at their personal experiences in supporting people without a health insurance certificate and their understanding of criticism, as well as what they envision for the future of this civil society aid organization.

The second article is a summary of a video interview with Steffi Fitzner from *Klinik statt Fabrik*, which we conducted with her in July 2021 in Jena. She talks about the criticisms she has of clinic operations as a nurse and trade unionist, as well as the impact the coronavirus pandemic has had on her everyday life and work. She also talks about strikes, the hurdles of a labor dispute in a clinic, and her demands for relief.

Under the title *Über Arbeitsrechte, staatliche Aktivierungsmaßnahmen und Klassenkampf*, there follows the field report *Ungenügend, schikanös und kontraproduktiv – die Hartz-IV-Gesetzgebung aus der Perspektive einer Sozialarbeiterin* and a conversation between the university union *unter\_bau* and striking Romanian workers. First, Verena Cömert shows us what the reality of Hartz IV means, what rights and obligations are associated with it, and why this (supposed) support system must be criticized from the perspective of social work. For this purpose, she takes a look at the topic from a personal and professional perspective and considers both the legislation and the side of the benefit recipients. This experience report seems to us (because it represents among other things an inside view from the office), to be an important support for the criticism of Hartz IV self-organization groups.

*Klassenkampf erlernen – gewerkschaftliche Basisarbeit an der Universität. Von Frankfurt nach Bornheim und zurück* is the title of an article first published in *diskus*. It was written following the strike of Romanian workers at the company *Spargel Ritter* in May 2020. The grassroots democratic trade union of the University of Frankfurt – the *unter\_bau* – reports on its insights gained from the conversations with the strikers about trade union organization, its difficulties as well as possible obstacles and contradictions in the formation of class consciousness.

Up to this point, our journal has been concerned with presenting and giving voice to non-academic contributions. In accordance with the subtitle of the journal – *Wissenschaft und Gesellschaft im Gespräch* – academic understandings of critique now follow. Peggy H. Breitenstein begins with a description of the notion of critique, which travels from the everyday concept via its Greek origins to Kant, Marx, Horkheimer and Adorno, and ends with a description of ideology critique as emancipatory social and

self-criticism. This is followed by a contribution by Alice Lagaay and Anna Suchard (vm. Seitz): they enter into a conversation about the search for new formats for the communication of philosophical content through various modes of performance, thereby developing a critical view of habituated forms and hierarchies of science. Knowledge – as the authors make clear – does not need a lonely desk far away from the world, but dialogues, events, processes in which it can be generated together as practice.

As noted at the beginning, at the end we as editors attempt to give a description of what has led us personally to work on the journal itself. There you will also find a contribution by Joule Weisz on the design of the cover of this first issue of *Außeruniversitäre Aktion*.

Finally, it remains to us to wish all readers that they find a stimulating reading and impulses for critical living in this first issue. With this issue, we hope to contribute to the awareness of movements and perspectives that have received little attention so far, so that in the future they will be more appreciated and their critiques will be taken seriously.

In addition to all the contributing authors, initiatives, and alliances, as well as artists, we would like to take this opportunity to express our special thanks to Sonja Deppe, whose help, especially during the initial phase of this project, contributed much to its success.

*Jena/Wien, den 31.10.2021*

*Helen Akin, Cindy Salzwedel & Paul\*A Helfritzs*
